# Supplementary material for: Identification and validation of a novel eight mutant-derived long non-coding RNAs signature as a prognostic biomarker for genome instability in low-grade glioma
Source: Aging (Albany NY). 2021 Jun 3;13(11):15164–92. doi: 10.18632/aging.203079 (PMC8221298; doi:10.18632/aging.203079)
Supplement: Supplementary Figures [file aging-13-203079-s001.pdf]

SUPPLEMENTARY FIGURES

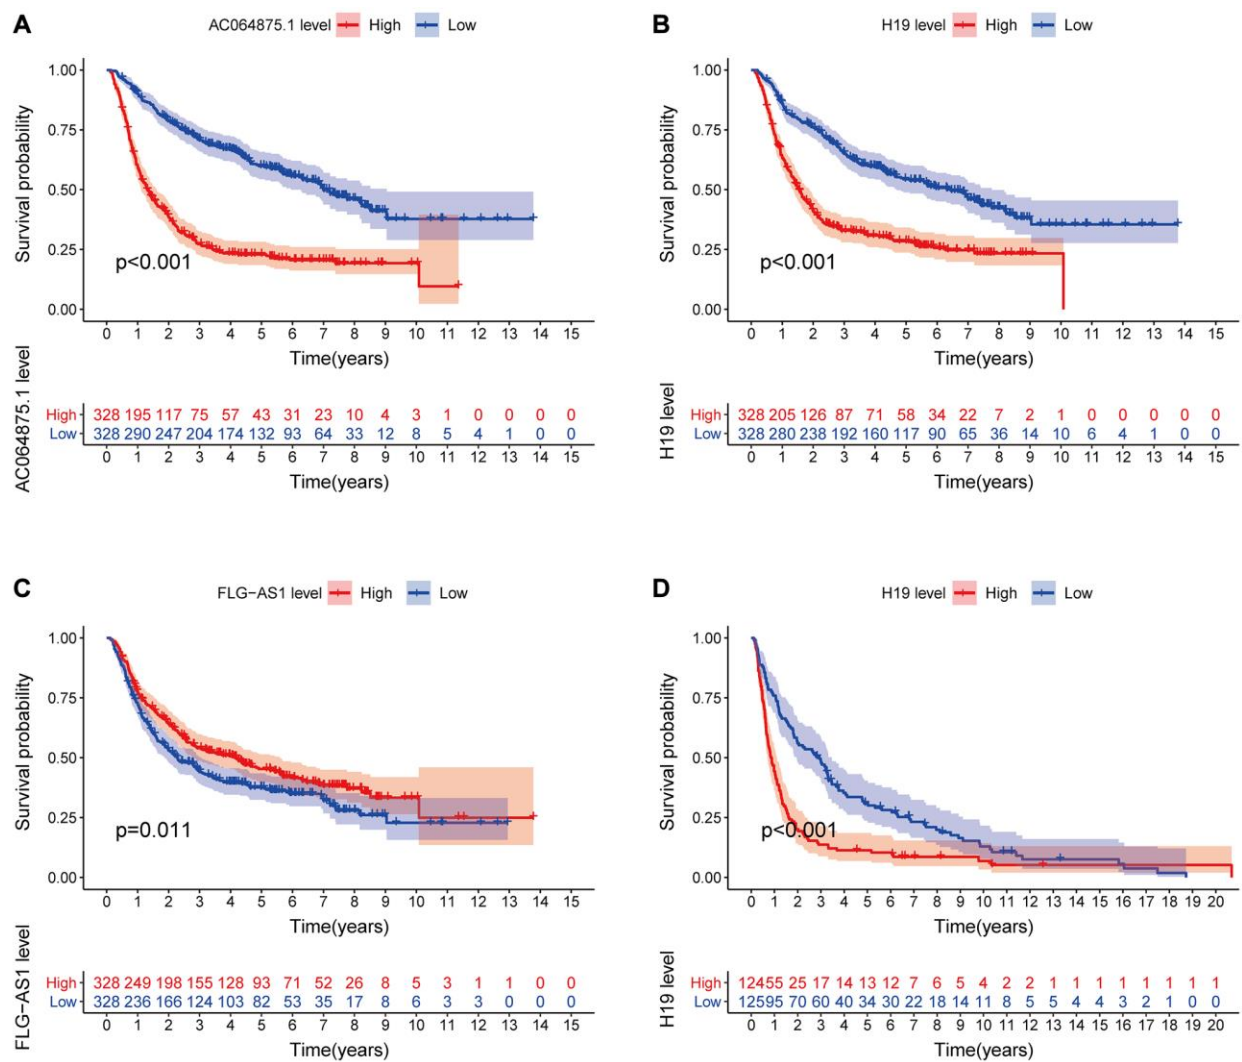

**Supplementary Figure 1.** (A–B) Overall survival probability of patients with high expression levels of AC064875.1 and H19 in the CGGA mRNA-seq-693 dataset was significantly lower compared with that of patients with low expression levels ( $p < 0.001$ ). (C) Overall survival probability of patients with high expression level of FLG-AS1 in the CGGA mRNA-seq-693 dataset was significantly higher compared with the low expression level of FLG-AS1. ( $P < 0.05$ ). (D) The overall survival probability of patients with low expression level of H19 in the GSE16011 dataset was significantly higher compared with the OS of patients with high expression of H19. ( $p < 0.001$ ).

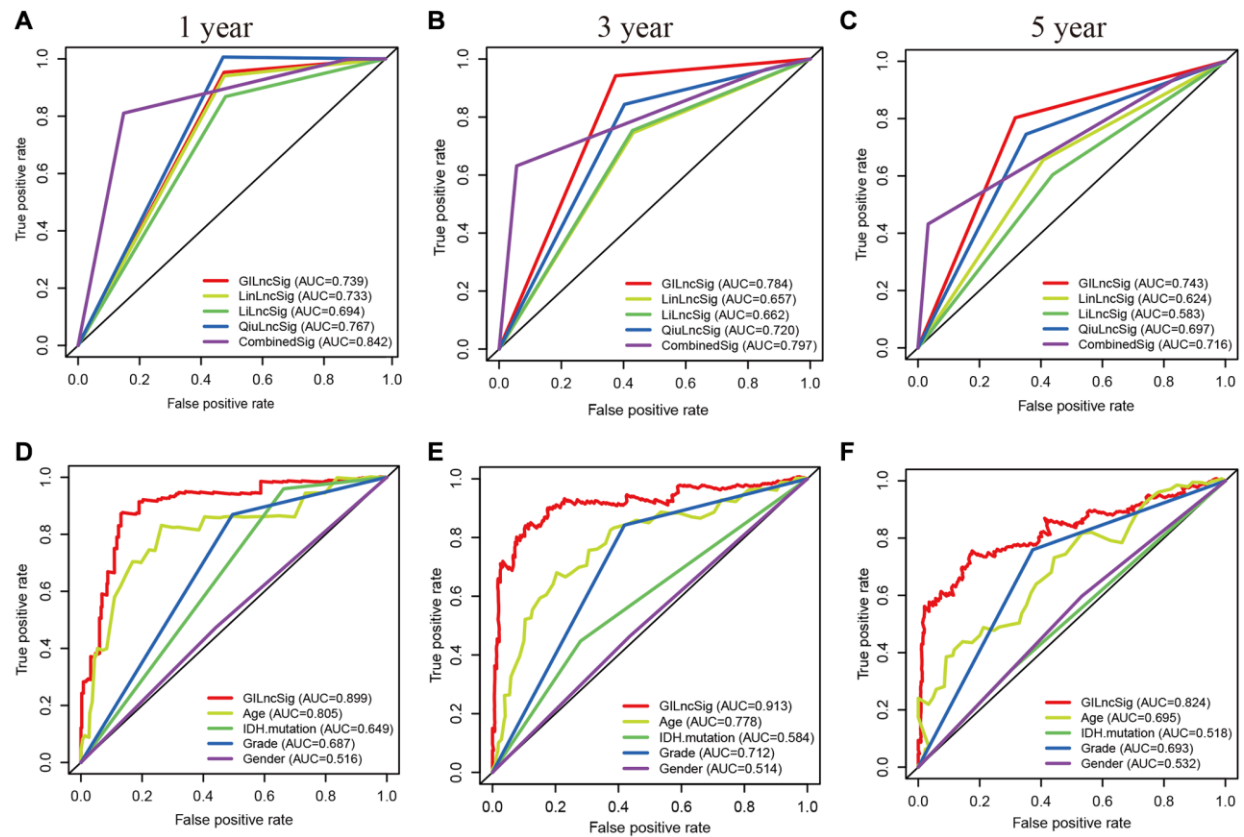

**Supplementary Figure 2.** (A–C) As the ROC curves showed, the CombinedSig signature could increase the prognostic power for 1 year and 3 year survival rate compared to other four independent signatures. (D–F) Receiver operating characteristic (ROC) curve analysis shows that the prediction of 1 year, 3 year and 5 year in the prognostic accuracy of clinicopathological parameters such as age, gender, IDH status and grade and GILncSig signature prognostic risk score.
