# Supplementary material for: Identification and validation of a novel eight mutant-derived long non-coding RNAs signature as a prognostic biomarker for genome instability in low-grade glioma
Source: Aging (Albany NY). 2021 Jun 3;13(11):15164–92. doi: 10.18632/aging.203079 (PMC8221298; doi:10.18632/aging.203079)
Supplement: Supplementary Table 2 [file aging-13-203079-s003.xlsx]

## Sheet: Sheet1
Supplementary Table 2. The specificity and sensitivity of each cut-off value of risk score signature.
riskScore cutoff	Sensitivity	Specificity
-0.956978	1	0
0.0492413	1	0.016
0.0599606	1	0.031
0.0650857	0.998	0.031
0.0724705	0.995	0.031
0.0797174	0.993	0.031
0.0822464	0.99	0.031
0.0844021	0.988	0.031
0.0850966	0.985	0.031
0.0927541	0.985	0.047
0.101459	0.983	0.047
0.105467	0.981	0.047
0.108065	0.978	0.047
0.110251	0.976	0.047
0.113301	0.973	0.047
0.116517	0.971	0.047
0.11999	0.969	0.047
0.121712	0.966	0.047
0.124336	0.964	0.047
0.127429	0.961	0.047
0.131923	0.959	0.047
0.13785	0.956	0.047
0.142336	0.954	0.047
0.147181	0.952	0.047
0.152736	0.949	0.047
0.157664	0.947	0.047
0.161197	0.944	0.047
0.163431	0.942	0.047
0.164548	0.939	0.047
0.167728	0.937	0.047
0.171224	0.935	0.047
0.173355	0.932	0.047
0.175375	0.932	0.062
0.176897	0.93	0.062
0.181469	0.93	0.078
0.187965	0.927	0.078
0.190911	0.925	0.078
0.191488	0.923	0.078
0.192369	0.92	0.078
0.192882	0.92	0.094
0.193142	0.92	0.109
0.194764	0.918	0.109
0.198763	0.915	0.109
0.202857	0.915	0.125
0.205491	0.913	0.125
0.20849	0.91	0.125
0.212455	0.908	0.125
0.214843	0.906	0.125
0.216712	0.906	0.141
0.218494	0.903	0.141
0.220086	0.901	0.141
0.229004	0.898	0.141
0.236622	0.896	0.141
0.237551	0.893	0.141
0.239635	0.891	0.141
0.24259	0.889	0.141
0.244781	0.886	0.141
0.245271	0.884	0.141
0.245932	0.884	0.156
0.247069	0.881	0.156
0.248268	0.879	0.156
0.249092	0.877	0.156
0.25115	0.874	0.156
0.25386	0.872	0.156
0.256122	0.869	0.156
0.257646	0.867	0.156
0.258142	0.864	0.156
0.259472	0.864	0.172
0.262869	0.862	0.172
0.266463	0.862	0.187
0.269154	0.86	0.187
0.271499	0.857	0.187
0.27227	0.855	0.187
0.273621	0.852	0.187
0.275958	0.85	0.187
0.27743	0.847	0.187
0.279271	0.845	0.187
0.282163	0.843	0.187
0.283864	0.84	0.187
0.285831	0.84	0.203
0.287815	0.838	0.203
0.291395	0.838	0.219
0.295048	0.835	0.219
0.296563	0.833	0.219
0.299009	0.831	0.219
0.304832	0.828	0.219
0.313554	0.826	0.219
0.317901	0.823	0.219
0.318647	0.821	0.219
0.319956	0.818	0.219
0.322448	0.816	0.219
0.325183	0.814	0.219
0.32646	0.811	0.219
0.327781	0.809	0.219
0.331757	0.806	0.219
0.335372	0.804	0.219
0.337532	0.801	0.219
0.341104	0.799	0.219
0.345262	0.797	0.219
0.348014	0.794	0.219
0.349358	0.792	0.219
0.350886	0.789	0.219
0.352794	0.787	0.219
0.354143	0.785	0.219
0.355323	0.785	0.234
0.356629	0.782	0.234
0.357485	0.782	0.25
0.359449	0.782	0.266
0.362167	0.78	0.266
0.364071	0.777	0.266
0.365421	0.775	0.266
0.366538	0.775	0.281
0.367652	0.772	0.281
0.368372	0.77	0.281
0.369266	0.768	0.281
0.370185	0.765	0.281
0.370718	0.763	0.281
0.371243	0.76	0.281
0.371646	0.758	0.281
0.373566	0.755	0.281
0.375634	0.753	0.281
0.377874	0.751	0.281
0.382517	0.748	0.281
0.385883	0.746	0.281
0.38663	0.743	0.281
0.38689	0.741	0.281
0.389444	0.738	0.281
0.393809	0.736	0.281
0.397514	0.734	0.281
0.39948	0.731	0.281
0.401506	0.731	0.297
0.404354	0.731	0.312
0.405446	0.729	0.312
0.407673	0.726	0.312
0.409837	0.724	0.312
0.410189	0.724	0.328
0.411205	0.724	0.344
0.412193	0.722	0.344
0.412929	0.719	0.344
0.413756	0.717	0.344
0.414661	0.717	0.359
0.415375	0.717	0.375
0.415768	0.714	0.375
0.417521	0.714	0.391
0.420255	0.714	0.406
0.422187	0.712	0.406
0.424285	0.709	0.406
0.426257	0.707	0.406
0.42814	0.705	0.406
0.429418	0.705	0.422
0.430106	0.702	0.422
0.431501	0.7	0.422
0.434243	0.697	0.422
0.437323	0.695	0.422
0.439076	0.692	0.422
0.44073	0.69	0.422
0.442077	0.688	0.422
0.44411	0.685	0.422
0.44773	0.683	0.422
0.45108	0.68	0.422
0.4526	0.678	0.422
0.454049	0.676	0.422
0.456298	0.673	0.422
0.457648	0.671	0.422
0.458107	0.668	0.422
0.458626	0.668	0.437
0.46226	0.666	0.437
0.466278	0.663	0.437
0.467152	0.661	0.437
0.471103	0.659	0.437
0.475433	0.659	0.453
0.476461	0.656	0.453
0.477732	0.654	0.453
0.485031	0.651	0.453
0.492808	0.649	0.453
0.493927	0.649	0.469
0.496159	0.646	0.469
0.499742	0.646	0.484
0.501243	0.644	0.484
0.504351	0.644	0.5
0.508842	0.644	0.516
0.511881	0.642	0.516
0.514106	0.642	0.531
0.515856	0.639	0.531
0.517607	0.639	0.547
0.520681	0.639	0.562
0.52614	0.637	0.562
0.532962	0.634	0.562
0.536861	0.632	0.562
0.537509	0.632	0.578
0.538541	0.63	0.578
0.541722	0.627	0.578
0.545051	0.627	0.594
0.55065	0.627	0.609
0.558189	0.625	0.609
0.562635	0.622	0.609
0.564593	0.62	0.609
0.564884	0.617	0.609
0.565324	0.615	0.609
0.569324	0.613	0.609
0.574119	0.613	0.625
0.57537	0.613	0.641
0.579958	0.61	0.641
0.596369	0.608	0.641
0.609827	0.605	0.641
0.611759	0.603	0.641
0.612233	0.6	0.641
0.613042	0.598	0.641
0.615858	0.596	0.641
0.619459	0.593	0.641
0.621314	0.591	0.641
0.623828	0.588	0.641
0.627288	0.586	0.641
0.628774	0.584	0.641
0.629348	0.581	0.641
0.632666	0.579	0.641
0.638814	0.576	0.641
0.642053	0.574	0.641
0.643262	0.571	0.641
0.645163	0.569	0.641
0.647705	0.567	0.641
0.649867	0.564	0.641
0.651305	0.562	0.641
0.655643	0.559	0.641
0.65959	0.559	0.656
0.662367	0.559	0.672
0.665044	0.557	0.672
0.66606	0.554	0.672
0.667795	0.552	0.672
0.669155	0.55	0.672
0.671729	0.547	0.672
0.675174	0.547	0.687
0.676823	0.545	0.687
0.678297	0.542	0.687
0.680397	0.54	0.687
0.684133	0.538	0.687
0.690653	0.535	0.687
0.698779	0.535	0.703
0.702975	0.533	0.703
0.704525	0.53	0.703
0.70603	0.528	0.703
0.70757	0.525	0.703
0.710985	0.523	0.703
0.713235	0.521	0.703
0.713737	0.518	0.703
0.717485	0.516	0.703
0.722726	0.513	0.703
0.726021	0.511	0.703
0.73247	0.508	0.703
0.740864	0.506	0.703
0.744847	0.504	0.703
0.747126	0.501	0.703
0.751703	0.499	0.703
0.755443	0.496	0.703
0.760006	0.494	0.703
0.764155	0.492	0.703
0.764773	0.489	0.703
0.765407	0.487	0.703
0.769769	0.484	0.703
0.774974	0.484	0.719
0.776949	0.484	0.734
0.777877	0.482	0.734
0.779025	0.479	0.734
0.781725	0.477	0.734
0.784496	0.475	0.734
0.787993	0.472	0.734
0.79256	0.47	0.734
0.801059	0.467	0.734
0.809189	0.465	0.734
0.811934	0.462	0.734
0.813605	0.46	0.734
0.817436	0.46	0.75
0.823844	0.458	0.75
0.829075	0.455	0.75
0.832059	0.453	0.75
0.834609	0.45	0.75
0.846467	0.448	0.75
0.857906	0.446	0.75
0.860874	0.443	0.75
0.86257	0.443	0.766
0.866411	0.441	0.766
0.870345	0.441	0.781
0.874151	0.438	0.781
0.879303	0.438	0.797
0.883898	0.436	0.797
0.888474	0.436	0.812
0.891565	0.433	0.812
0.896034	0.431	0.812
0.900102	0.429	0.812
0.902076	0.426	0.812
0.905864	0.424	0.812
0.909139	0.421	0.812
0.913631	0.419	0.812
0.921706	0.416	0.812
0.927203	0.414	0.812
0.930099	0.412	0.812
0.932237	0.409	0.812
0.933856	0.407	0.812
0.939192	0.404	0.812
0.947993	0.402	0.812
0.954393	0.4	0.812
0.96024	0.397	0.812
0.975191	0.395	0.812
0.991913	0.392	0.812
0.999058	0.392	0.828
1.00657	0.39	0.828
1.01244	0.387	0.828
1.01489	0.385	0.828
1.02612	0.383	0.828
1.03925	0.38	0.828
1.04858	0.378	0.828
1.05817	0.375	0.828
1.06506	0.373	0.828
1.07219	0.373	0.844
1.0842	0.37	0.844
1.0926	0.368	0.844
1.09901	0.366	0.844
1.10857	0.363	0.844
1.11716	0.361	0.844
1.12214	0.358	0.844
1.127	0.356	0.844
1.14906	0.354	0.844
1.16979	0.351	0.844
1.18311	0.351	0.859
1.1938	0.349	0.859
1.20127	0.346	0.859
1.22078	0.344	0.859
1.23616	0.341	0.859
1.24534	0.341	0.875
1.25869	0.339	0.875
1.26957	0.337	0.875
1.2747	0.334	0.875
1.27893	0.332	0.875
1.29559	0.329	0.875
1.31616	0.327	0.875
1.33193	0.324	0.875
1.34374	0.324	0.891
1.34651	0.322	0.891
1.35999	0.32	0.891
1.37331	0.32	0.906
1.37894	0.317	0.906
1.3883	0.317	0.922
1.40463	0.317	0.937
1.42015	0.315	0.937
1.42664	0.312	0.937
1.43594	0.31	0.937
1.44215	0.308	0.937
1.44433	0.305	0.937
1.45174	0.303	0.937
1.47509	0.3	0.937
1.5082	0.298	0.937
1.53308	0.295	0.937
1.54423	0.295	0.953
1.55869	0.293	0.953
1.57759	0.291	0.953
1.58523	0.288	0.953
1.58711	0.286	0.953
1.59131	0.283	0.953
1.59532	0.281	0.953
1.62568	0.278	0.953
1.65738	0.278	0.969
1.70425	0.276	0.969
1.75081	0.274	0.969
1.76543	0.271	0.969
1.78756	0.269	0.969
1.80829	0.266	0.969
1.82214	0.264	0.969
1.84691	0.262	0.969
1.89406	0.259	0.969
1.93154	0.257	0.969
1.94843	0.254	0.969
1.9547	0.252	0.969
1.96758	0.249	0.969
2.00283	0.247	0.969
2.04579	0.245	0.969
2.10565	0.242	0.969
2.15192	0.24	0.969
2.17293	0.237	0.969
2.25213	0.235	0.969
2.39018	0.232	0.969
2.50059	0.23	0.969
2.54614	0.228	0.969
2.56571	0.225	0.969
2.58104	0.223	0.969
2.60542	0.22	0.969
2.6309	0.218	0.969
2.65097	0.215	0.969
2.6993	0.213	0.969
2.75916	0.211	0.969
2.78779	0.208	0.969
2.80738	0.206	0.969
2.8747	0.203	0.969
2.9314	0.201	0.969
2.94518	0.199	0.969
2.9628	0.196	0.969
2.97254	0.194	0.969
3.0546	0.191	0.969
3.17426	0.189	0.969
3.21635	0.186	0.969
3.22042	0.184	0.969
3.26721	0.182	0.969
3.32974	0.179	0.969
3.42741	0.177	0.969
3.51477	0.174	0.969
3.56722	0.172	0.969
3.62195	0.169	0.969
3.64295	0.167	0.969
3.75208	0.165	0.969
3.94794	0.162	0.969
4.07171	0.16	0.969
4.14608	0.16	0.984
4.29032	0.157	0.984
4.47346	0.155	0.984
4.59954	0.153	0.984
4.68186	0.15	0.984
4.76529	0.148	0.984
4.98211	0.145	0.984
5.26927	0.143	0.984
5.43589	0.14	0.984
5.63111	0.138	0.984
5.97303	0.136	0.984
6.26201	0.133	0.984
6.43058	0.131	0.984
6.73213	0.128	0.984
7.07332	0.126	0.984
7.2911	0.123	0.984
7.39046	0.121	0.984
7.45849	0.119	0.984
7.64071	0.116	0.984
7.77468	0.114	0.984
7.87233	0.111	0.984
7.97677	0.109	0.984
8.1901	0.107	0.984
8.72018	0.104	0.984
9.37363	0.102	0.984
9.71978	0.099	0.984
10.2373	0.097	0.984
11.2807	0.094	0.984
11.9965	0.092	0.984
12.3299	0.09	0.984
12.6073	0.087	0.984
13.1542	0.085	0.984
13.8651	0.082	0.984
14.2344	0.08	0.984
14.7663	0.077	0.984
15.3388	0.075	0.984
16.8103	0.073	0.984
18.1451	0.07	0.984
18.4874	0.068	0.984
19.048	0.065	0.984
19.674	0.063	0.984
20.4325	0.061	0.984
21.0795	0.058	0.984
21.4412	0.056	0.984
22.8241	0.053	0.984
25.3922	0.051	0.984
26.6677	0.048	0.984
28.001	0.046	0.984
30.1163	0.044	0.984
31.2356	0.041	0.984
33.1933	0.039	0.984
37.6296	0.036	0.984
43.7335	0.034	0.984
48.8215	0.034	1
52.2833	0.031	1
62.1296	0.029	1
71.7626	0.027	1
80.578	0.024	1
89.5035	0.022	1
92.1839	0.019	1
94.0995	0.017	1
99.542	0.015	1
109.985	0.012	1
130.941	0.01	1
171.565	0.007	1
247.356	0.005	1
416.013	0.002	1
535.361	0	1
